# Supplementary material for: Study protocol for a 10-year prospective observational study, examining lymphoedema and patient-reported outcome after breast reconstruction
Source: HighWire-hosted journal article supplement (doi:10.1136/bmjopen-2021-052676), 2021-12-01
Supplement: bmjopen-2021-052676supp001_data_supplement.pdf [file bmjopen-2021-052676supp001_data_supplement.pdf]

|                                      | <b>Variables/measures</b>                                                                                                                                                                                                                                                   | <b>Method</b>                                                                      | <b>Timepoint</b>           |
|--------------------------------------|-----------------------------------------------------------------------------------------------------------------------------------------------------------------------------------------------------------------------------------------------------------------------------|------------------------------------------------------------------------------------|----------------------------|
| <b>Demographic data</b>              | Age, sex, race, employment, level of education                                                                                                                                                                                                                              | Medical records                                                                    | Baseline                   |
| <b>Health-related data</b>           | Smoking habits, alcohol consumption, BMI, medical consumption, medical comorbidities                                                                                                                                                                                        | Medical records                                                                    | Baseline                   |
| <b>Cancer-related data</b>           | Indication for the mastectomy (oncologic or prophylactic), adjuvant therapy (radiation-, chemo- or endocrine therapy), time from neoadjuvant treatment to surgery                                                                                                           | Medical records                                                                    | Baseline                   |
| <b>Surgery related data</b>          | Lymph node dissection (None, sentinel node, axillary dissection), operation time, type of breast reconstruction, type and dose of peroperative antibiotic, operating plastic surgeon, mastectomy weight, implant type and size, use of ICG-angiography and SPY measurements | Medical records                                                                    | Postoperative              |
| <b>Post-surgery related data</b>     | Time to drain removal, postoperative hospitalisation time                                                                                                                                                                                                                   | Medical records                                                                    | Postoperative              |
| <b>Complications</b>                 | Hematoma requiring surgical intervention, cellulitis/wound infection (and treatment), necrosis or epidermolysis of the skin flaps at the reconstructed breast, implant loss, red breast syndrome, seroma requiring intervention                                             | Medical records                                                                    | Postoperative              |
| <b>Breast aesthetic related data</b> | J-P, PI, M-P, and base measurements<br>Aesthetic outcome<br>Scar assessment                                                                                                                                                                                                 | Medical records<br>BRA score<br>Patient and Observer Scar Assessment Score (POSAS) | Baseline,<br>postoperative |

|                          |                                                                                               |                                                                                                                                                                                                                                                                                           |                            |
|--------------------------|-----------------------------------------------------------------------------------------------|-------------------------------------------------------------------------------------------------------------------------------------------------------------------------------------------------------------------------------------------------------------------------------------------|----------------------------|
| <b>Wellbeing</b>         | QoL<br>Depression<br>Body image<br>Patient-reported satisfaction<br>Concerns about recurrence | Satisfaction with Life Scale (SWLS)<br>Beck Depression Inventory (BDI)<br>Hopwood's Body Image Scale (BIS)<br>BREAST-Q<br>Concerns about recurrence Questionnaire (CARQ-3)                                                                                                                | Baseline,<br>postoperative |
| <b>Lymphoedema</b>       | Stage of lymphoedema if present                                                               | <ul style="list-style-type: none"> <li>• Centimetre circumference of the arm, every 4<sup>th</sup> centimetre from the axillae to the most distal point on the wrist.</li> <li>• Hand measured using figure-of-eight in centimetres</li> <li>• SOZO bioimpedance spectroscopy.</li> </ul> | Baseline,<br>postoperative |
| <b>Shoulder mobility</b> | Shoulder range of motion                                                                      | By goniometer on a full circle                                                                                                                                                                                                                                                            | Baseline,<br>postoperative |
